# Supplementary material
Source: publisher figshare collection journal article supplement (https://acs.figshare.com/ndownloader/files/9698365)
Supplement: Supplementary file 1 [file 9698365]

**Supporting Information**  
**Exploration of Zinc Oxide Nanoparticles as a Multitarget and**  
**Multifunctional Anticancer Nanomedicine**

*Jiao Wang,<sup>†</sup> Jung Seok Lee,<sup>‡</sup> Dongin Kim,<sup>†</sup> and Lin Zhu<sup>\*,†</sup>*

<sup>†</sup> Department of Pharmaceutical Sciences, Irma Lerma Rangel College of Pharmacy, Texas A&M University Health Science Center, Kingsville, Texas 78363, United States

<sup>‡</sup> Department of Biomedical Engineering, School of Engineering & Applied Science, Yale University, New Haven, Connecticut 06511, United States

\* Corresponding Author:

Lin Zhu

Department of Pharmaceutical Sciences, Irma Lerma Rangel College of Pharmacy, Texas A&M University Health Science Center, Kingsville, Texas 78363, United States

Tel: 3612210757

E-mail: lzhu@tamhsc.edu

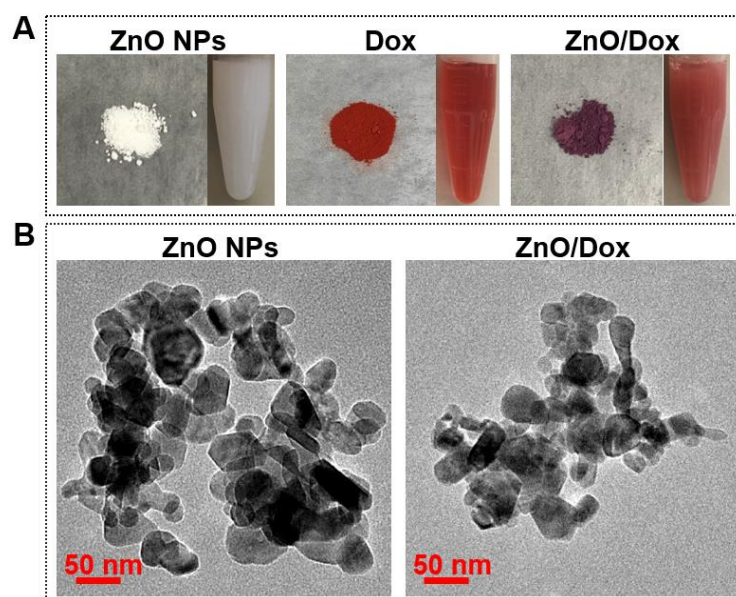

**Figure S1.** Photographic images (A) and TEM micrographs (B) of ZnO NPs and ZnO/Dox.

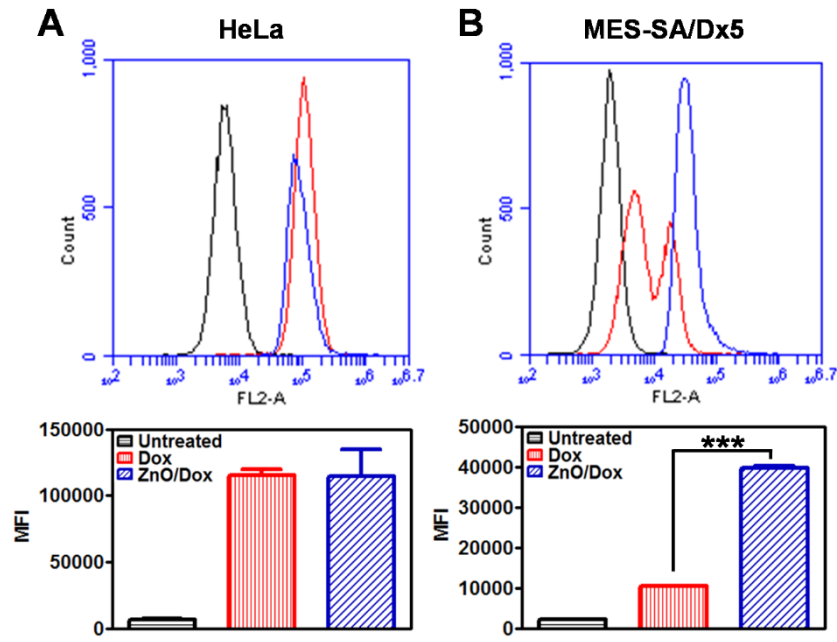

**Figure S2.** Cellular uptake of Dox and ZnO/Dox determined by flow cytometry. (A) HeLa cells and (B) MES-SA/Dx5 cells. Incubation time: 1h. Data are presented as the mean  $\pm$  SD. \*\*\* $P < 0.001$ .

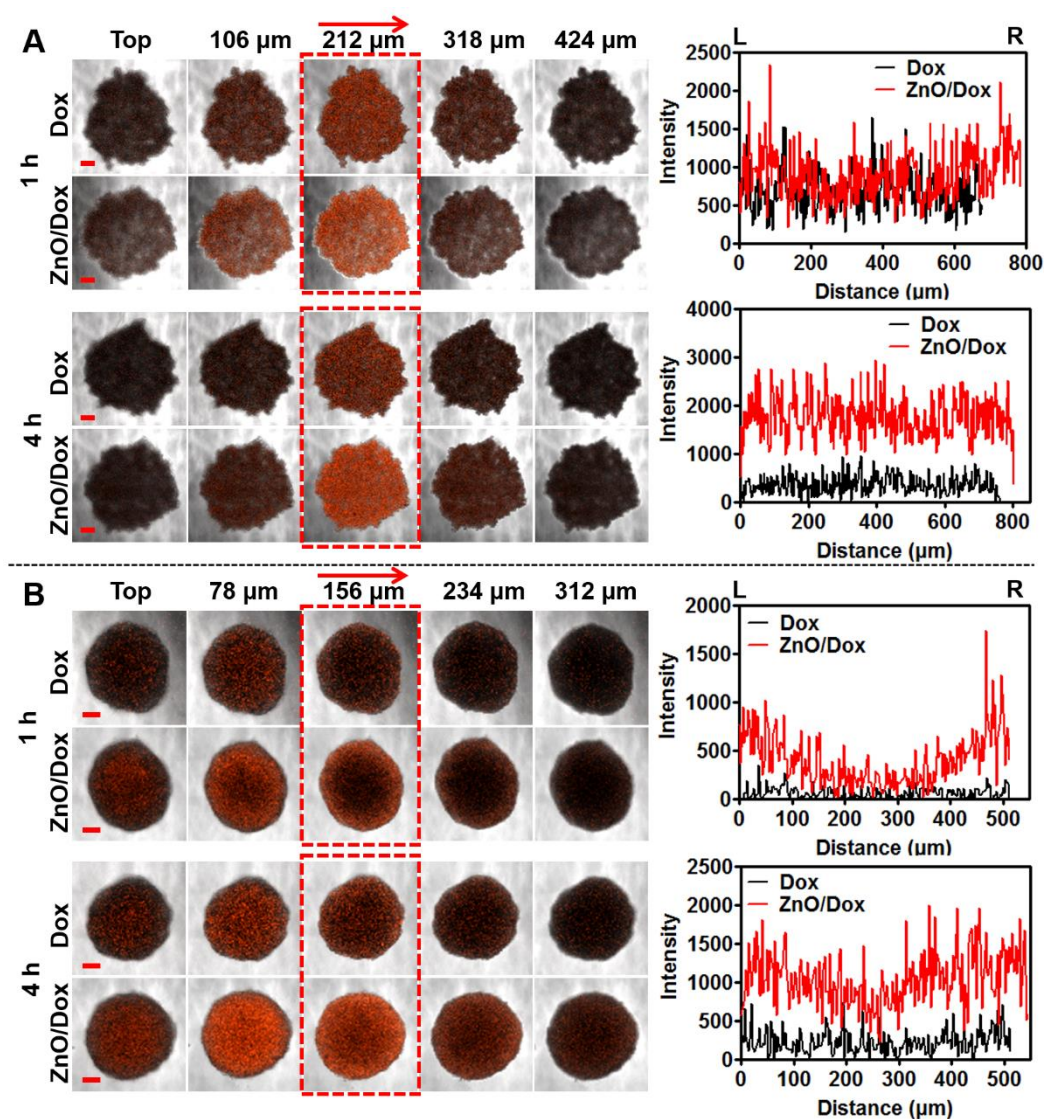

**Figure S3.** Drug penetration through (A) MDA-MB-231 and (B) NCI/ADR-RES cell spheroids. The right panels are the fluorescence intensity of the selected Z-stack images analyzed by a NIS-Elements AR software. L: left, R: right. The scale bar represents 100  $\mu\text{m}$ .

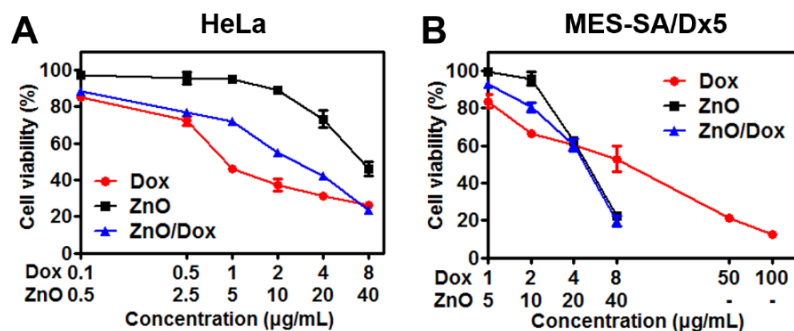

**Figure S4.** Cytotoxicity of Dox, ZnO NPs, and ZnO/Dox in (A) HeLa and (B) MES-SA/Dx5 cell monolayers. Cells were incubated with the formulations for 24 h, followed by MTT Assay. Data are presented as the mean  $\pm$  SD.

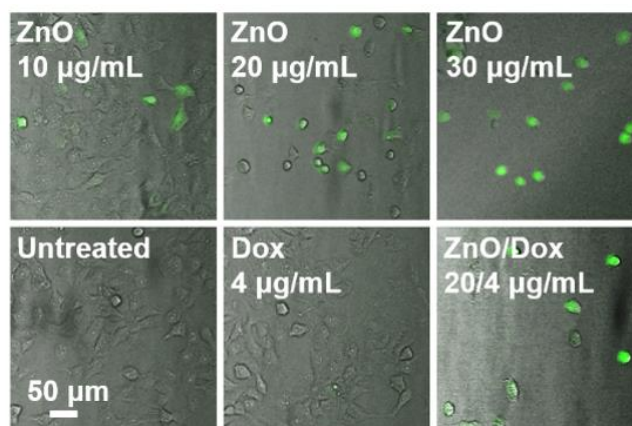

**Figure S5.** Intracellular levels of ROS. The NCI/ADR-RES cells were incubated with the formulations for 24 h. The intracellular ROS production was stained by H2DCFDA and analyzed by fluorescence microscopy.

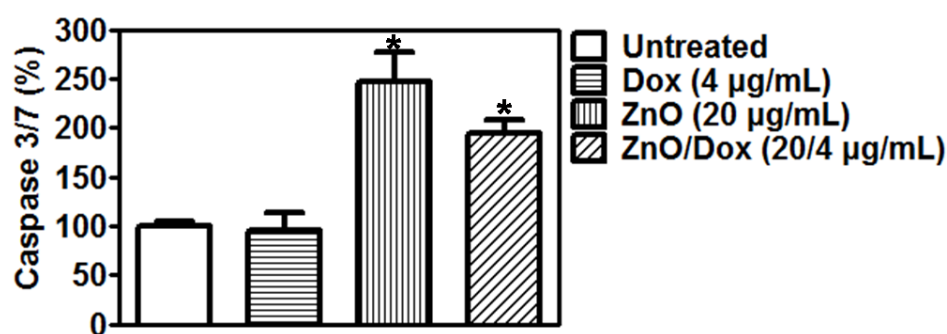

**Figure S6.** Intracellular levels of caspase 3/7. The NCI/ADR-RES cells were incubated with the formulations for 24 h. The caspase levels were measured by the Apo-ONE® Homogeneous Caspase-3/7 Assay (Promega). Data are presented as the mean  $\pm$  SD. \* $P < 0.05$ . All  $P$ -values shown are vs the untreated group.

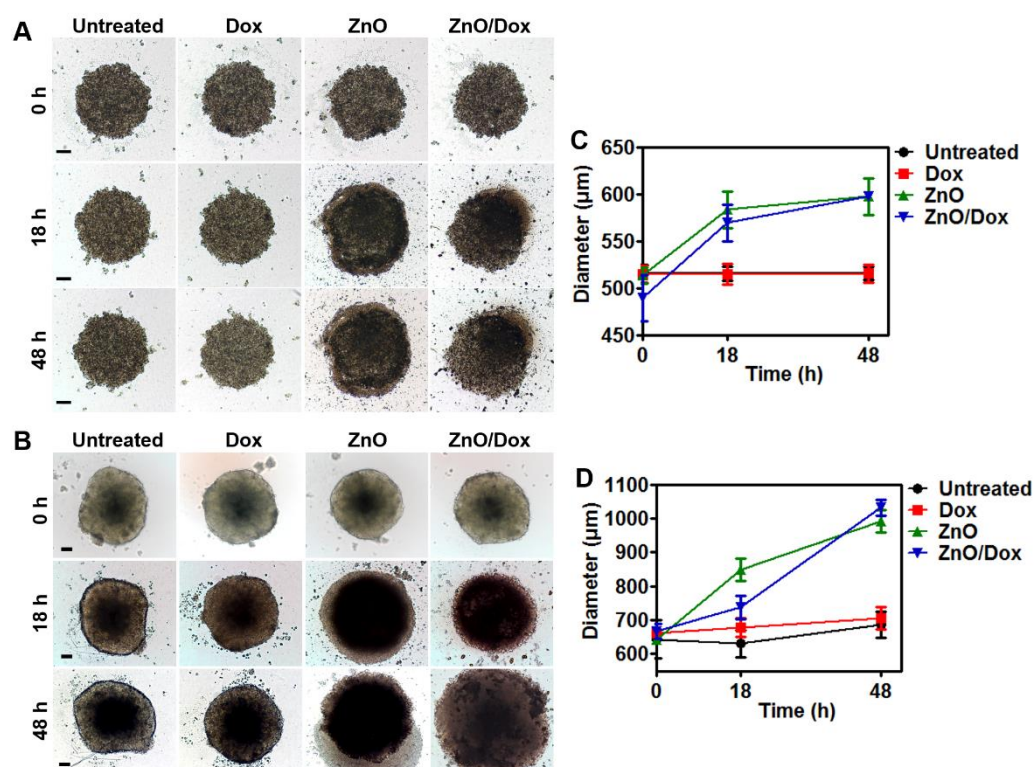

**Figure S7.** Images of (A) MDA-MB-231 and (B) NCI/ADR-RES cell spheroids after treatment with Dox, ZnO NPs, and ZnO/Dox. The images were captured by a Nikon Eclipse Ti microscope system at 40 $\times$ . The scale bar represents 100  $\mu\text{m}$ . The

mean size of (C) MDA-MB-231 and (D) NCI/ADR-RES spheroids was measured under microscopy.

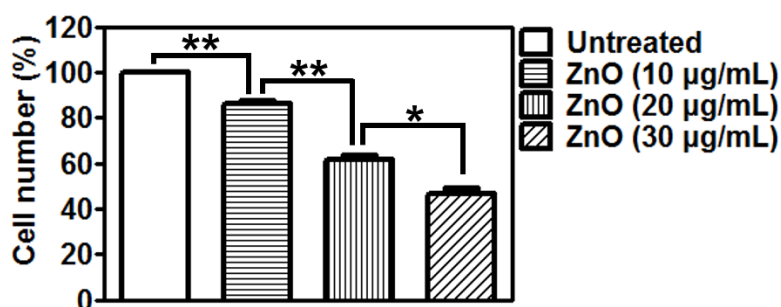

**Figure S8.** Inhibition of cancer cell adhesion by ZnO NPs. The cell number of the untreated group was served as 100%. Data are presented as the mean  $\pm$  SD. \* $P < 0.05$ , \*\* $P < 0.01$ .

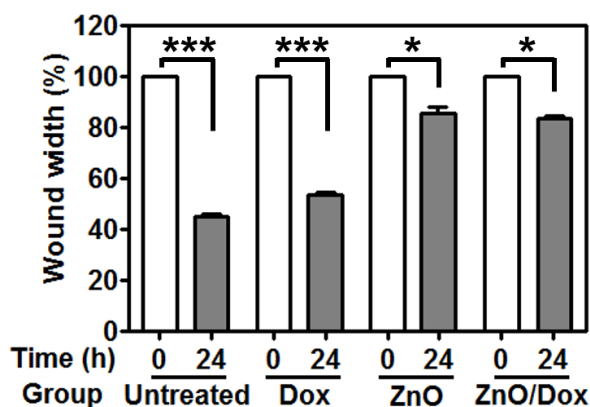

**Figure S9.** Inhibition of cancer cell migration in the presence of Dox, ZnO, or ZnO/Dox. The wound width was measured after 24 h incubation in the serum-free medium. The wound width at 0 h was used as 100%. Data are presented as the mean  $\pm$  SD. \* $P < 0.05$ , \*\*\* $P < 0.001$ .

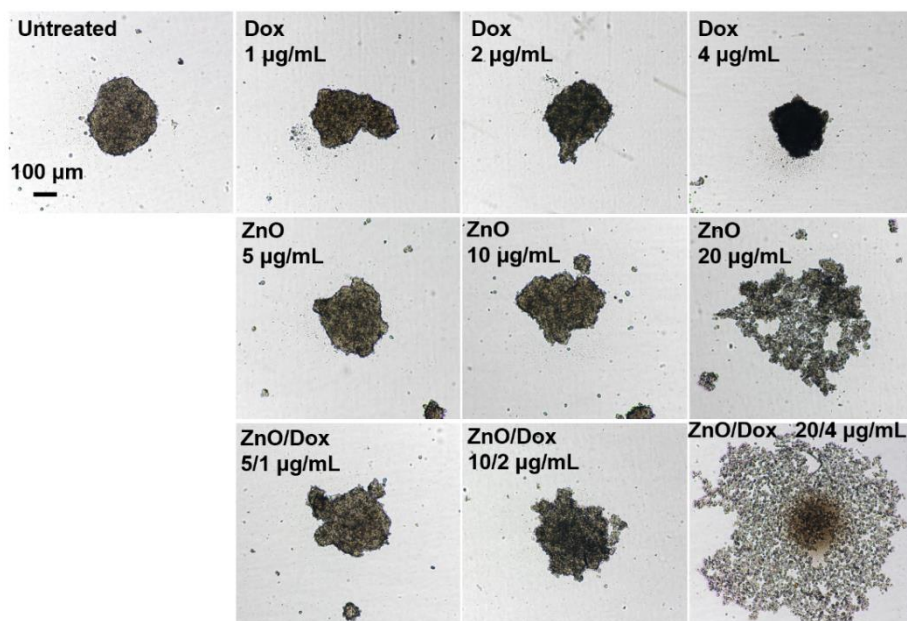

**Figure S10.** Inhibition of tumor cell spheroid formation. The NCI/ADR-RES cells were seeded into the agarose-coated 96-well plates and incubated in the presence of Dox, ZnO NPs, or ZnO/Dox for 48 h. The scale bar represents 100  $\mu\text{m}$ .

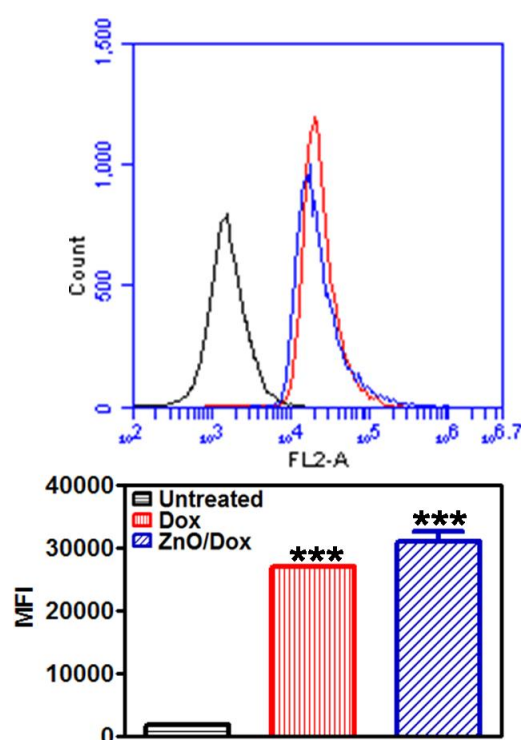

**Figure S11.** Cellular uptake of Dox and ZnO/Dox in the RAW264.7 cells, determined by flow cytometry. Incubation time: 1 h. Data are presented as the mean  $\pm$  SD. \*\*\* $P < 0.001$ . All  $P$ -values shown are *vs* the untreated group.

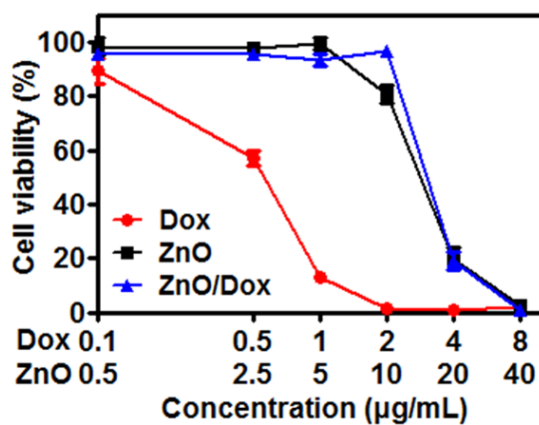

**Figure S12.** Cytotoxicity of Dox, ZnO NPs, or ZnO/Dox in the RAW264.7 cells. The cell viability was determined by MTT Assay after 24 h cell incubation. Data are presented as the mean  $\pm$  SD.

**Table S1.** The IC<sub>50</sub> of Dox, ZnO, and ZnO/Dox in various cancer cells.

|                |     | IC <sub>50</sub> (µg/mL) |            |             |            |
|----------------|-----|--------------------------|------------|-------------|------------|
|                |     | MDA-MB-231               | HeLa       | NCI/ADR-RES | MES-SA/Dx5 |
| <b>Dox</b>     |     | 0.77±0.01                | 0.82±0.02  | 48.57±1.13  | 8.21±1.07  |
| <b>ZnO NPs</b> |     | 33.58±1.01               | 37.10±0.89 | 19.04±0.87  | 20.64±0.25 |
| <b>ZnO/Dox</b> | Dox | 2.61±0.73                | 2.76±0.68  | 3.72±0.57   | 4.13±0.74  |
|                | ZnO | 13.05±0.58               | 13.80±0.49 | 18.60±0.76  | 20.63±0.46 |
